# Supplementary material for: Force field refinement for reproducing experimental infrared spectra of ionic liquids
Source: Royal Society of Chemistry journal article supplement (doi:10.1039/d3cp00932g), 2023-01-01
Supplement: d3cp00932g1.pdf [file d3cp00932g1.pdf]

# Force field refinement for reproducing experimental infrared spectra of ionic liquids

## Supplementary Information

András Szabadi,<sup>a,b</sup> Aleksandar Doknic,<sup>c</sup> Jonathan Netsch,<sup>a</sup> Ádám Márk Pálvögyi,<sup>d</sup> Othmar Steinhauser<sup>a</sup> and Christian Schröder<sup>a\*</sup>

<sup>a</sup> Department of Computational Biological Chemistry, Faculty of Chemistry, University of Vienna, Währingerstr. 17, A-1090 Vienna, Austria, email:christian.schroeder@univie.ac.at

<sup>b</sup> University of Vienna, Doctoral School in Chemistry (DoSChem), Währingerstr. 42, 1090 Vienna, Austria

<sup>c</sup> Research Network Data Science, University of Vienna, Kolingasse 14-16, Vienna, Austria

<sup>d</sup> Institute of Applied Synthetic Chemistry, Vienna Technical University, Vienna, Austria

### Contents

|          |                                                               |           |
|----------|---------------------------------------------------------------|-----------|
| <b>1</b> | <b>QM level of theory</b>                                     | <b>2</b>  |
| <b>2</b> | <b>FFGenOpt</b>                                               | <b>3</b>  |
| 2.1      | Genetic algorithms                                            | 3         |
| 2.2      | Alignment of MM and QM normal modes for the ionic liquid ions | 5         |
| 2.2.1    | Imidazoliums                                                  | 5         |
| 2.2.2    | Tetrafluoroborate                                             | 6         |
| 2.2.3    | Trifluoromethanesulfonate                                     | 6         |
| 2.2.4    | Acetate                                                       | 6         |
| 2.2.5    | Dicyanamide                                                   | 7         |
| 2.3      | Optimized force constants of FFGenOpt                         | 8         |
| 2.3.1    | C <sub>2</sub> mim <sup>+</sup>                               | 8         |
| 2.3.2    | C <sub>4</sub> mim <sup>+</sup>                               | 9         |
| 2.3.3    | Tetrafluoroborate                                             | 11        |
| 2.3.4    | Trifluoromethanesulfonate                                     | 11        |
| 2.3.5    | Acetate                                                       | 12        |
| 2.3.6    | Dicyanamide                                                   | 12        |
| 2.4      | IR Spectra using scaled force constants                       | 13        |
| <b>3</b> | <b>Technical issues of calculating IR spectra</b>             | <b>14</b> |
| 3.1      | Numerical time-derivative versus velocities                   | 14        |
| 3.2      | The influence of SHAKE                                        | 15        |
| 3.3      | Machine learning potentials                                   | 16        |
| 3.4      | Mixed MD/ML approaches                                        | 17        |

# 1 QM level of theory

An evaluation of the impact of the level of theory and basis set on the Quantum Mechanical (QM) frequencies was conducted to affirm the integrity of the input data. Using Psi4, QM frequencies across several basis sets

- cc-PVDZ
- cc-PVTZ
- aug-cc-pVTZ

and functionals

- HF
- B3LYP
- B3LYP D3
- B3LYP PCM
- MP2

were calculated and subsequently represented graphically against each other to manifest the extent of the deviation, as demonstrated below. Please note, that the QM gas phase scaling factors have been applied.<sup>1,2</sup>

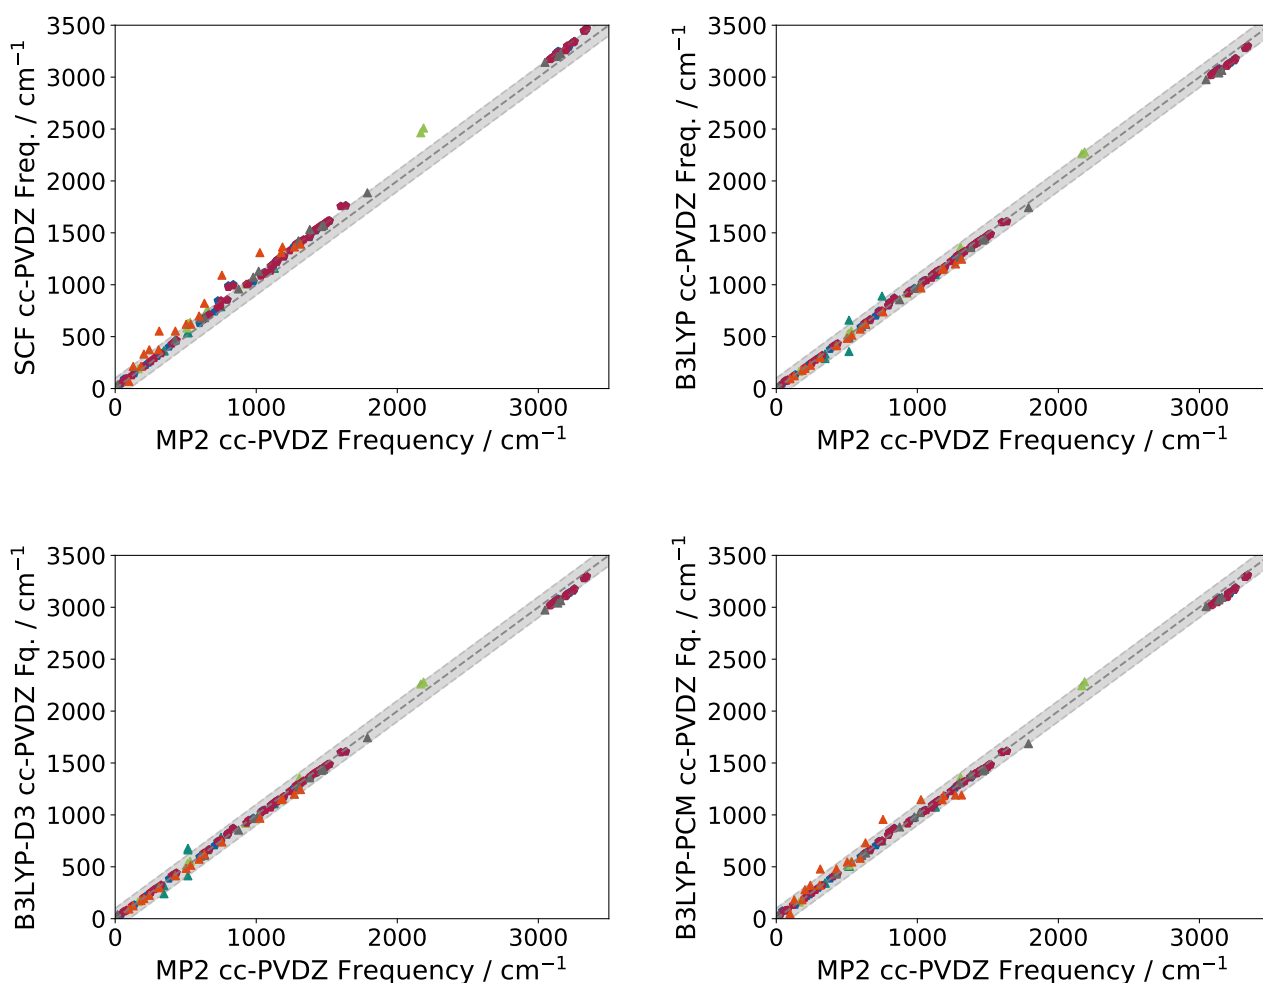

Even though the Hartree Fock-based method exhibits a small systematic drift when compared to higher levels of theory, all higher levels of theory show insignificant deviations between frequencies. Thus, for the application of FFGenOpt, the MP2 level of theory with a cc-PVDZ basis set can be considered sufficient.

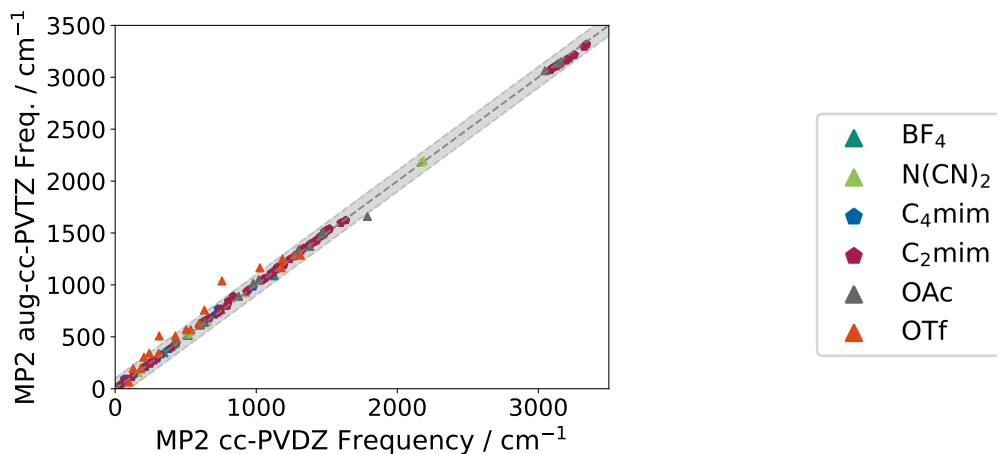

Figure S1: QM frequencies in  $cm^{-1}$  plotted against each other.

## 2 FFGenOpt

FFGenOpt is predicated on the Automated Frequency Matching Method (AFMM),<sup>3</sup> which employs the vibran module in CHARMM or a Hessian calculation in OpenMM to compute normal mode frequencies derived from a specified force field. Initially, modifications were restricted solely to bond and angle force constants. The algorithm is built upon a rudimentary Monte Carlo scheme, offering an effective foundation for the evolution of more advanced methodologies.

The integrity of the generated parameters was assessed via a merit function:

$$Y^2 = \sum_{i=1}^{3N-6} \Omega_i^2 \left( \tilde{\nu}_i^{FF} - \tilde{\nu}_i^{QM} \right)^2 \quad (1)$$

The modes  $\tilde{\nu}_i^{FF}$  and  $\tilde{\nu}_i^{QM}$  are aligned by projecting the eigenvectors. However, several  $\tilde{\nu}_i^{FF}$  may map onto the same  $\tilde{\nu}_i^{QM}$  if the QM eigenvector is the most appropriate fit for both  $\tilde{\nu}_i^{FF}$ .  $\Omega_i^2$  serves as a weight parameter that may be utilized to induce a bias towards frequencies of higher relevance.

While the merit function remains a feature within FFGenOpt, mode alignment is now conducted using the Hungarian method,<sup>4</sup> ensuring that each Molecular Mechanics (MM) normal mode corresponds to a distinct QM mode. A key improvement is the substitution of the Monte Carlo method with a genetic algorithm, enhancing optimization by emphasizing ideal frequencies and facilitating simultaneous adjustments of multiple force constants.

### 2.1 Genetic algorithms

Historically, there have been multiple approaches to what is nowadays known as evolutionary computation. The concept of evolution strategies was explored by Rechenberg<sup>5</sup> since the 1960s when the concept of genetic algorithms was developed by Holland in the 1970s.<sup>6,7</sup> Similar to artificial neural networks, which are inspired by biological neural networks, genetic algorithms are inspired by genetic mutations that occur in nature.<sup>6</sup> Nature successfully uses genetic mutations to solve complex problems.

Supervised machine learning algorithms, including neural networks and support vector machines, present a significant drawback: the necessity for substantial volumes of data to construct an efficacious model, a process colloquially referred to as 'training a model'. Such algorithms are ill-suited for scenarios wherein such data is either unavailable or its generation would be prohibitively costly.

Calculatory methods, though adept at identifying local optima either by equating the gradient of the objective function to zero and solving sets of equations or through local gradient methods such as steepest descent, also harbor noteworthy disadvantages. Primarily, these local methods exclusively explore the vicinity, potentially overlooking superior results situated further from the starting point. Additionally, these methodologies are highly reliant on the existence of a derivative of the objective function. However, objective functions on real-world problems frequently lack a derivative, deviating from the smoothness characteristic of elementary mathematical functions, thereby necessitating the approximation of the gradient for such methodologies.

These beneficial attributes, in conjunction with several other significant advantages over numeric algorithms, have been succinctly encapsulated by Wirsansky:<sup>8</sup>

- **Global Optimization:** In contrast to many conventional optimization algorithms that limit their search to the vicinity of a starting point and potentially stagnate at local optima, Genetic algorithms operate with a broad array of solution candidates. As such, they can span an extensive search space and exhibit robustness towards local minima, contingent on sufficient population diversity.
- **Addressing Problems with Complex Mathematical Representation:** GA merely necessitates a fitness function for assessing potential solutions, thereby eliminating dependence on supplementary information about the search space, such as derivatives.
- **Tackling Problems Lacking Mathematical Representation:** The fitness function is not predicated on a mathematical representation. It is feasible, for instance, to employ subjective user-determined fitness values.
- **Noise Resilience:** Genetic algorithms may even be implemented for problems wherein the output of the fitness function, with identical input parameters, is non-deterministic. This includes instances of sensor data or user input.
- **Parallelism and Distributed Processing Support:** Fitness evaluations, mutations, and crossovers among solution candidates can be executed in parallel on distinct members of the population, circumventing many of the parallelizations challenges common to numerous algorithms.
- **Appropriateness for Continuous Learning:** Genetic algorithms maintain functionality even amidst environmental alterations, and previous populations may be employed to continue the computation.

However, there are also limitations to genetic algorithms which should be considered:

- **Requirement for Special Definitions:** The task of correctly formulating the problem in terms of chromosome and fitness function can be demanding. The definition of selection, crossover, and mutation operators must also be specifically tailored based on the representation.
- **Hyperparameter Tuning:** Much like other optimization methodologies, GA necessitate appropriately tuned hyperparameters (such as population size or mutation rate) to discern optimal solutions within an acceptable timeframe.
- **Computational Intensity:** Owing to their operation on multiple solution candidates as opposed to a singular one, GA can render computations more iterative.
- **Premature Convergence:** A population characterized by low diversity, that is, elevated similarity among population members, can precipitate convergence to the fittest member, consequently stagnating at a local minimum.
- **Absence of Solution Guarantee:** There exists no assurance that the global optimum will be located.

It is pertinent to acknowledge that these advantages and constraints are merely a generalized overview. Some optimization algorithms and GA may address the above-mentioned challenges. However, a thorough analysis of the plethora of algorithms exceeds the purview of this thesis. When selecting optimization methodologies, it is recommended to examine domain-specific solutions for optimization problems.

The source code, as well as a tutorial on how to use FFGenOpt, is available free of charge from [github\(https://github.com/cbc-univie/FFGenOpt\)](https://github.com/cbc-univie/FFGenOpt).

## 2.2 Alignment of MM and QM normal modes for the ionic liquid ions

This chapter contains all MM normal mode frequencies and their alignment to the QM modes in the gas phase. A visual representation of these data is given in Fig. 2 of the main article.

### 2.2.1 Imidazoliums

We focused on the most prominent cation family for ionic liquids, *i.e.* imidazoliums. Although having the most force field parameters and the most normal modes, the optimization process for the imidazoliums 1-ethyl-3-methylimidazolium  $C_2mim^+$  and 1-butyl-3-methylimidazolium  $C_4mim^+$  is straightforward as the normal mode eigenvectors differ significantly from each other and the molecules do not have high symmetry.

|    | $\tilde{\nu}_{QM}$ [cm <sup>-1</sup> ] | $\tilde{\nu}_{FF}$ [cm <sup>-1</sup> ] |    | $\tilde{\nu}_{QM}$ [cm <sup>-1</sup> ] | $\tilde{\nu}_{FF}$ [cm <sup>-1</sup> ] |    | $\tilde{\nu}_{QM}$ [cm <sup>-1</sup> ] | $\tilde{\nu}_{FF}$ [cm <sup>-1</sup> ] |
|----|----------------------------------------|----------------------------------------|----|----------------------------------------|----------------------------------------|----|----------------------------------------|----------------------------------------|
| 1  | 64                                     | 11                                     | 18 | 1105                                   | 1022                                   | 35 | 1268                                   | 1719                                   |
| 2  | 43                                     | 48                                     | 19 | 1310                                   | 1065                                   | 36 | 1423                                   | 1808                                   |
| 3  | 135                                    | 117                                    | 20 | 1140                                   | 1122                                   | 37 | 3323                                   | 1893                                   |
| 4  | 237                                    | 220                                    | 21 | 1119                                   | 1126                                   | 38 | 1432                                   | 1973                                   |
| 5  | 216                                    | 226                                    | 22 | 1126                                   | 1146                                   | 39 | 1635                                   | 2048                                   |
| 6  | 383                                    | 361                                    | 23 | 837                                    | 1154                                   | 40 | 1600                                   | 2199                                   |
| 7  | 298                                    | 439                                    | 24 | 1041                                   | 1172                                   | 41 | 3128                                   | 2777                                   |
| 8  | 630                                    | 449                                    | 25 | 1388                                   | 1215                                   | 42 | 3140                                   | 2823                                   |
| 9  | 599                                    | 559                                    | 26 | 1493                                   | 1351                                   | 43 | 3247                                   | 2888                                   |
| 10 | 662                                    | 603                                    | 27 | 1492                                   | 1363                                   | 44 | 3202                                   | 2892                                   |
| 11 | 803                                    | 618                                    | 28 | 1379                                   | 1379                                   | 45 | 3256                                   | 2896                                   |
| 12 | 707                                    | 671                                    | 29 | 1197                                   | 1418                                   | 46 | 1056                                   | 3118                                   |
| 13 | 728                                    | 729                                    | 30 | 1455                                   | 1525                                   | 47 | 3107                                   | 3224                                   |
| 14 | 422                                    | 790                                    | 31 | 1507                                   | 1590                                   | 48 | 3217                                   | 3341                                   |
| 15 | 795                                    | 813                                    | 32 | 1485                                   | 1601                                   | 49 | 3223                                   | 3341                                   |
| 16 | 980                                    | 1008                                   | 33 | 1519                                   | 1605                                   | 50 | 3343                                   | 3427                                   |
| 17 | 1151                                   | 1010                                   | 34 | 1476                                   | 1627                                   | 51 | 3331                                   | 3444                                   |

Table S1: Normal modes of 1-ethyl-3-methylimidazolium  $C_2mim^+$ .

|    | $\tilde{\nu}_{QM}$ [cm <sup>-1</sup> ] | $\tilde{\nu}_{FF}$ [cm <sup>-1</sup> ] |    | $\tilde{\nu}_{QM}$ [cm <sup>-1</sup> ] | $\tilde{\nu}_{FF}$ [cm <sup>-1</sup> ] |    | $\tilde{\nu}_{QM}$ [cm <sup>-1</sup> ] | $\tilde{\nu}_{FF}$ [cm <sup>-1</sup> ] |
|----|----------------------------------------|----------------------------------------|----|----------------------------------------|----------------------------------------|----|----------------------------------------|----------------------------------------|
| 1  | 30                                     | 32                                     | 24 | 1046                                   | 970                                    | 47 | 1288                                   | 1434                                   |
| 2  | 75                                     | 67                                     | 25 | 931                                    | 973                                    | 48 | 1431                                   | 1519                                   |
| 3  | 62                                     | 80                                     | 26 | 1033                                   | 978                                    | 49 | 1146                                   | 1555                                   |
| 4  | 81                                     | 98                                     | 27 | 1155                                   | 1045                                   | 50 | 1422                                   | 1633                                   |
| 5  | 119                                    | 130                                    | 28 | 1387                                   | 1073                                   | 51 | 1634                                   | 1743                                   |
| 6  | 201                                    | 186                                    | 29 | 1102                                   | 1096                                   | 52 | 1600                                   | 1756                                   |
| 7  | 253                                    | 256                                    | 30 | 1065                                   | 1118                                   | 53 | 1408                                   | 1836                                   |
| 8  | 326                                    | 276                                    | 31 | 1237                                   | 1191                                   | 54 | 1475                                   | 1848                                   |
| 9  | 248                                    | 317                                    | 32 | 1486                                   | 1216                                   | 55 | 3128                                   | 3007                                   |
| 10 | 634                                    | 372                                    | 33 | 1195                                   | 1232                                   | 56 | 3095                                   | 3010                                   |
| 11 | 278                                    | 378                                    | 34 | 1336                                   | 1245                                   | 57 | 3090                                   | 3047                                   |
| 12 | 626                                    | 445                                    | 35 | 1321                                   | 1258                                   | 58 | 3128                                   | 3055                                   |
| 13 | 668                                    | 552                                    | 36 | 1519                                   | 1262                                   | 59 | 3083                                   | 3072                                   |
| 14 | 403                                    | 586                                    | 37 | 1485                                   | 1264                                   | 60 | 3154                                   | 3111                                   |
| 15 | 435                                    | 628                                    | 38 | 1500                                   | 1284                                   | 61 | 3201                                   | 3113                                   |
| 16 | 744                                    | 739                                    | 39 | 836                                    | 1288                                   | 62 | 3247                                   | 3115                                   |
| 17 | 750                                    | 767                                    | 40 | 1122                                   | 1293                                   | 63 | 3193                                   | 3117                                   |
| 18 | 802                                    | 819                                    | 41 | 1502                                   | 1297                                   | 64 | 3256                                   | 3117                                   |
| 19 | 794                                    | 840                                    | 42 | 1509                                   | 1325                                   | 65 | 3205                                   | 3118                                   |
| 20 | 727                                    | 856                                    | 43 | 1490                                   | 1342                                   | 66 | 3135                                   | 3120                                   |
| 21 | 1105                                   | 891                                    | 44 | 1282                                   | 1352                                   | 67 | 3343                                   | 3261                                   |
| 22 | 945                                    | 923                                    | 45 | 1455                                   | 1388                                   | 68 | 3324                                   | 3263                                   |
| 23 | 1150                                   | 944                                    | 46 | 1374                                   | 1406                                   | 69 | 3331                                   | 3603                                   |

Table S2: Normal modes of 1-butyl-3-methylimidazolium  $C_4mim^+$ .

## 2.2.2 Tetrafluoroborate

While the frequencies of  $\text{BF}_4^-$  are matched well, the experimental spectrum of  $[\text{C}_4\text{mim}]\text{BF}_4$  shows a peak in the region between  $1000$  and  $1100\text{ cm}^{-1}$ , where neither the cation nor the anion produce any frequencies in the gas phase.

|   | $\tilde{\nu}_{QM} [\text{cm}^{-1}]$ | $\tilde{\nu}_{FF} [\text{cm}^{-1}]$ |   | $\tilde{\nu}_{QM} [\text{cm}^{-1}]$ | $\tilde{\nu}_{FF} [\text{cm}^{-1}]$ |   | $\tilde{\nu}_{QM} [\text{cm}^{-1}]$ | $\tilde{\nu}_{FF} [\text{cm}^{-1}]$ |
|---|-------------------------------------|-------------------------------------|---|-------------------------------------|-------------------------------------|---|-------------------------------------|-------------------------------------|
| 1 | 750                                 | 352                                 | 4 | 516                                 | 371                                 | 7 | 1127                                | 1130                                |
| 2 | 516                                 | 370                                 | 5 | 346                                 | 514                                 | 8 | 1126                                | 1132                                |
| 3 | 516                                 | 371                                 | 6 | 346                                 | 515                                 | 9 | 1126                                | 1134                                |

Table S3: Normal modes of tetrafluoroborate  $\text{BF}_4^-$ .

## 2.2.3 Trifluoromethanesulfonate

|   | $\tilde{\nu}_{QM} [\text{cm}^{-1}]$ | $\tilde{\nu}_{FF} [\text{cm}^{-1}]$ |    | $\tilde{\nu}_{QM} [\text{cm}^{-1}]$ | $\tilde{\nu}_{FF} [\text{cm}^{-1}]$ |    | $\tilde{\nu}_{QM} [\text{cm}^{-1}]$ | $\tilde{\nu}_{FF} [\text{cm}^{-1}]$ |
|---|-------------------------------------|-------------------------------------|----|-------------------------------------|-------------------------------------|----|-------------------------------------|-------------------------------------|
| 1 | 97                                  | 69                                  | 7  | 308                                 | 414                                 | 13 | 1026                                | 832                                 |
| 2 | 183                                 | 178                                 | 8  | 312                                 | 414                                 | 14 | 1271                                | 1044                                |
| 3 | 204                                 | 179                                 | 9  | 595                                 | 479                                 | 15 | 1313                                | 1044                                |
| 4 | 633                                 | 255                                 | 10 | 503                                 | 482                                 | 16 | 1186                                | 1304                                |
| 5 | 427                                 | 256                                 | 11 | 535                                 | 483                                 | 17 | 757                                 | 1357                                |
| 6 | 242                                 | 275                                 | 12 | 127                                 | 644                                 | 18 | 1177                                | 1358                                |

Table S4: Normal modes of trifluoromethanesulfonate  $\text{OTf}^-$ .

|   | $\tilde{\nu}_{QM} [\text{cm}^{-1}]$ | $\tilde{\nu}_{FF} [\text{cm}^{-1}]$ |    | $\tilde{\nu}_{QM} [\text{cm}^{-1}]$ | $\tilde{\nu}_{FF} [\text{cm}^{-1}]$ |    | $\tilde{\nu}_{QM} [\text{cm}^{-1}]$ | $\tilde{\nu}_{FF} [\text{cm}^{-1}]$ |
|---|-------------------------------------|-------------------------------------|----|-------------------------------------|-------------------------------------|----|-------------------------------------|-------------------------------------|
| 1 | 69                                  | 66                                  | 7  | 553                                 | 373                                 | 13 | 1092                                | 962                                 |
| 2 | 213                                 | 219                                 | 8  | 554                                 | 373                                 | 14 | 1364                                | 1175                                |
| 3 | 213                                 | 219                                 | 9  | 620                                 | 415                                 | 15 | 1364                                | 1175                                |
| 4 | 332                                 | 266                                 | 10 | 620                                 | 415                                 | 16 | 1391                                | 1239                                |
| 5 | 374                                 | 319                                 | 11 | 699                                 | 461                                 | 17 | 1309                                | 1298                                |
| 6 | 374                                 | 319                                 | 12 | 822                                 | 612                                 | 18 | 1309                                | 1298                                |

Table S5: Normal modes of trifluoromethanesulfonate  $\text{OTf}^-$  of the original force field.<sup>9</sup>

## 2.2.4 Acetate

|   | $\tilde{\nu}_{QM} [\text{cm}^{-1}]$ | $\tilde{\nu}_{FF} [\text{cm}^{-1}]$ |    | $\tilde{\nu}_{QM} [\text{cm}^{-1}]$ | $\tilde{\nu}_{FF} [\text{cm}^{-1}]$ |    | $\tilde{\nu}_{QM} [\text{cm}^{-1}]$ | $\tilde{\nu}_{FF} [\text{cm}^{-1}]$ |
|---|-------------------------------------|-------------------------------------|----|-------------------------------------|-------------------------------------|----|-------------------------------------|-------------------------------------|
| 1 | 16                                  | 202                                 | 6  | 426                                 | 898                                 | 11 | 979                                 | 1452                                |
| 2 | 1788                                | 466                                 | 7  | 1477                                | 1112                                | 12 | 1380                                | 1593                                |
| 3 | 875                                 | 563                                 | 8  | 1464                                | 1201                                | 13 | 3047                                | 3092                                |
| 4 | 634                                 | 767                                 | 9  | 1017                                | 1375                                | 14 | 3138                                | 3160                                |
| 5 | 606                                 | 823                                 | 10 | 1299                                | 1408                                | 15 | 3159                                | 3167                                |

Table S6: Normal modes of acetate  $\text{OAc}^-$ .

|   | $\tilde{\nu}_{QM} [\text{cm}^{-1}]$ | $\tilde{\nu}_{FF} [\text{cm}^{-1}]$ |    | $\tilde{\nu}_{QM} [\text{cm}^{-1}]$ | $\tilde{\nu}_{FF} [\text{cm}^{-1}]$ |    | $\tilde{\nu}_{QM} [\text{cm}^{-1}]$ | $\tilde{\nu}_{FF} [\text{cm}^{-1}]$ |
|---|-------------------------------------|-------------------------------------|----|-------------------------------------|-------------------------------------|----|-------------------------------------|-------------------------------------|
| 1 | 467                                 | 414                                 | 6  | 1073                                | 1031                                | 11 | 1561                                | 1521                                |
| 2 | 36                                  | 591                                 | 7  | 1130                                | 1035                                | 12 | 1886                                | 1612                                |
| 3 | 683                                 | 626                                 | 8  | 1532                                | 1303                                | 13 | 3142                                | 2908                                |
| 4 | 677                                 | 687                                 | 9  | 1424                                | 1365                                | 14 | 3199                                | 2969                                |
| 5 | 959                                 | 901                                 | 10 | 1572                                | 1520                                | 15 | 3227                                | 2970                                |

Table S7: Normal modes of acetate  $\text{OAc}^-$  of the original force field.<sup>10</sup>

### 2.2.5 Dicyanamide

The QM vibrational frequency of the C≡N bond is difficult to reproduce, both regarding the gas phase normal modes and in the bulk IR spectra. The quantum mechanical frequencies around  $2500\text{ cm}^{-1}$  are significantly higher than expected, while experimental values are in the range typically associated with triple bonds (around  $2100$  to  $2200\text{ cm}^{-1}$ ).

The low frequencies are challenging to reproduce in both acetate and dicyanamide, leading to some of the largest discrepancies in the entire investigated set of ions. In all cases, extra care has to be taken to account for degenerate eigenmodes, arising due to symmetry, as well as to perform an RMS calculation and align the coordinates to the reference prior to matching the eigenvectors.

|   | $\tilde{\nu}_{QM}$ [ $\text{cm}^{-1}$ ] | $\tilde{\nu}_{FF}$ [ $\text{cm}^{-1}$ ] |   | $\tilde{\nu}_{QM}$ [ $\text{cm}^{-1}$ ] | $\tilde{\nu}_{FF}$ [ $\text{cm}^{-1}$ ] |   | $\tilde{\nu}_{QM}$ [ $\text{cm}^{-1}$ ] | $\tilde{\nu}_{FF}$ [ $\text{cm}^{-1}$ ] |
|---|-----------------------------------------|-----------------------------------------|---|-----------------------------------------|-----------------------------------------|---|-----------------------------------------|-----------------------------------------|
| 1 | 532                                     | 28                                      | 4 | 508                                     | 716                                     | 7 | 1306                                    | 1394                                    |
| 2 | 516                                     | 64                                      | 5 | 654                                     | 769                                     | 8 | 2167                                    | 2435                                    |
| 3 | 163                                     | 284                                     | 6 | 928                                     | 1148                                    | 9 | 2186                                    | 2485                                    |

Table S8: Normal modes of dicyanamide  $\text{N}(\text{CN})_2^-$ .

|   | $\tilde{\nu}_{QM}$ [ $\text{cm}^{-1}$ ] | $\tilde{\nu}_{FF}$ [ $\text{cm}^{-1}$ ] |   | $\tilde{\nu}_{QM}$ [ $\text{cm}^{-1}$ ] | $\tilde{\nu}_{FF}$ [ $\text{cm}^{-1}$ ] |   | $\tilde{\nu}_{QM}$ [ $\text{cm}^{-1}$ ] | $\tilde{\nu}_{FF}$ [ $\text{cm}^{-1}$ ] |
|---|-----------------------------------------|-----------------------------------------|---|-----------------------------------------|-----------------------------------------|---|-----------------------------------------|-----------------------------------------|
| 1 | 627                                     | 61                                      | 4 | 191                                     | 634                                     | 7 | 1410                                    | 1253                                    |
| 2 | 637                                     | 115                                     | 5 | 584                                     | 652                                     | 8 | 2509                                    | 2065                                    |
| 3 | 1007                                    | 235                                     | 6 | 765                                     | 1006                                    | 9 | 2464                                    | 2136                                    |

Table S9: Normal modes of dicyanamide  $\text{N}(\text{CN})_2^-$  of the original force field.<sup>9</sup>

## 2.3 Optimized force constants of FFGenOpt

All displayed force constants here are not modified by the scaling factor for the liquid phase.

### 2.3.1 C<sub>2</sub>mim<sup>+</sup>

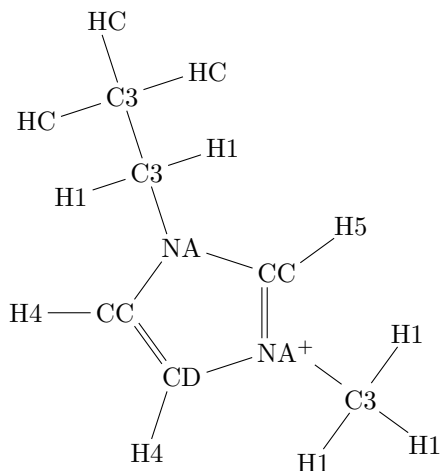

| Atom type 1 | Atom type 2 | k <sub>1</sub><br>[kcal mol <sup>-1</sup> Å <sup>-2</sup> ] | k <sub>2</sub><br>[kcal mol <sup>-1</sup> Å <sup>-2</sup> ] |
|-------------|-------------|-------------------------------------------------------------|-------------------------------------------------------------|
| C3          | H1          | 335.9                                                       | 318.91                                                      |
| C3          | NA          | 334.7                                                       | 258.67                                                      |
| CC          | NA          | 438.8                                                       | 622.3                                                       |
| CD          | NA          | 438.8                                                       | 518.59                                                      |
| CC          | H5          | 356.0                                                       | 459.42                                                      |
| CC          | CD          | 504.0                                                       | 414.37                                                      |
| CC          | H4          | 350.1                                                       | 150.0                                                       |
| CD          | H4          | 350.1                                                       | 453.83                                                      |
| C3          | C3          | 303.1                                                       | 654.61                                                      |
| C3          | HC          | 337.3                                                       | 427.82                                                      |

Table S10: C<sub>2</sub>mim<sup>+</sup> bond parameters. k<sub>1</sub> taken from Ref. 9, k<sub>2</sub> from FFGenOpt

| Atom type 1 | Atom type 2 | Atom type 3 | k <sub>1</sub><br>[kcal mol <sup>-1</sup> rad <sup>-2</sup> ] | k <sub>2</sub><br>[kcal mol <sup>-1</sup> rad <sup>-2</sup> ] |
|-------------|-------------|-------------|---------------------------------------------------------------|---------------------------------------------------------------|
| C3          | NA          | CC          | 62.56                                                         | 188.47                                                        |
| H1          | C3          | H1          | 39.18                                                         | 47.5                                                          |
| H1          | C3          | NA          | 49.9                                                          | 45.28                                                         |
| NA          | CC          | NA          | 73.65                                                         | 191.59                                                        |
| NA          | CC          | H5          | 49.76                                                         | 59.48                                                         |
| NA          | CD          | CC          | 72.91                                                         | 200.0                                                         |
| NA          | CD          | H4          | 50.22                                                         | 21.96                                                         |
| NA          | C3          | C3          | 65.73                                                         | 77.82                                                         |
| CC          | NA          | CD          | 63.88                                                         | 211.83                                                        |
| CC          | NA          | CC          | 68.94                                                         | 140.09                                                        |
| NA          | CC          | CD          | 72.91                                                         | 161.11                                                        |
| NA          | CC          | H4          | 50.22                                                         | 210.8                                                         |
| CC          | CD          | H4          | 47.19                                                         | 127.63                                                        |
| CD          | NA          | C3          | 62.56                                                         | 138.34                                                        |
| CD          | CC          | H4          | 47.19                                                         | 185.0                                                         |
| C3          | C3          | HC          | 46.37                                                         | 65.82                                                         |
| H1          | C3          | C3          | 46.36                                                         | 20.0                                                          |
| HC          | C3          | HC          | 39.43                                                         | 28.06                                                         |

Table S11: C<sub>2</sub>mim<sup>+</sup> angle parameters. k<sub>1</sub> taken from Ref. 9, k<sub>2</sub> from FFGenOpt



| Atom type 1 | Atom type 2 | Atom type 3 | Atom type 4 | $n$ | $k_1$<br>[kcal mol <sup>-1</sup> ] | $k_2$<br>[kcal mol <sup>-1</sup> ] |
|-------------|-------------|-------------|-------------|-----|------------------------------------|------------------------------------|
| X           | C3          | NA          | X           | 2   | 0.00                               | 0.00                               |
| X           | CC          | NA          | X           | 2   | 0.85                               | 0.85                               |
| X           | CD          | NA          | X           | 2   | 0.85                               | 0.85                               |
| X           | CC          | CD          | X           | 2   | 2.00                               | 2.00                               |
| X           | C3          | C3          | X           | 3   | 0.08                               | 0.08                               |
| CC          | NA          | C3          | C3          | 1   | 0.01                               | 0.01                               |
| CC          | NA          | C3          | C3          | 2   | 0.12                               | 0.12                               |
| CC          | NA          | C3          | C3          | 3   | 0.16                               | 0.16                               |
| CC          | NA          | C3          | C3          | 4   | 0.02                               | 0.02                               |
| CC          | NA          | C           | C3          | 6   | 0.01                               | 0.01                               |

Table S12:  $C_2mim^+$  dihedral parameters, X denotes a wildcard.  $k_1$  taken from Ref. 9,  $k_2$  from FFGenOpt

### 2.3.2 $C_4mim^+$

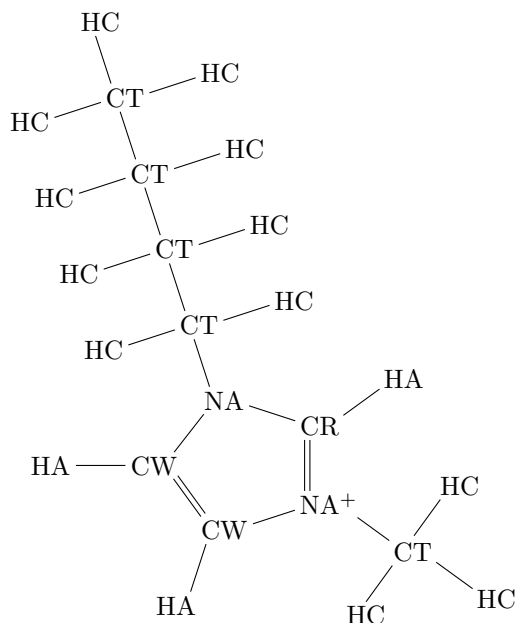

| Atom type 1 | Atom type 2 | $k_1$<br>[kcal mol <sup>-1</sup> Å <sup>-2</sup> ] | $k_2$<br>[kcal mol <sup>-1</sup> Å <sup>-2</sup> ] |
|-------------|-------------|----------------------------------------------------|----------------------------------------------------|
| CR          | HA          | 367.0                                              | 507.6                                              |
| CR          | NA          | 476.68                                             | 304.13                                             |
| CT          | HC          | 340.0                                              | 372.53                                             |
| CT          | CT          | 267.82                                             | 510.01                                             |
| CW          | HA          | 367.0                                              | 413.75                                             |
| CW          | CW          | 519.65                                             | 408.67                                             |
| CW          | NA          | 426.72                                             | 453.98                                             |
| HN          | NA          | 474.0                                              | 979.10                                             |
| NA          | CT          | 336.78                                             | 219.79                                             |

Table S13:  $C_4mim^+$  bond parameters.  $k_1$  taken from Ref. 11,  $k_2$  from FFGenOpt

| Atom type 1 | Atom type 2 | Atom type 3 | $k_1$<br>[kcal mol <sup>-1</sup> rad <sup>-2</sup> ] | $k_2$<br>[kcal mol <sup>-1</sup> rad <sup>-2</sup> ] |
|-------------|-------------|-------------|------------------------------------------------------|------------------------------------------------------|
| CA          | CA          | CA          | 70.0                                                 | 140.08                                               |
| CA          | CA          | HA          | 35.0                                                 | 62.22                                                |
| CA          | CA          | NA          | 70.0                                                 | 80.73                                                |
| CA          | NA          | CA          | 70.0                                                 | 24.65                                                |
| CA          | NA          | CT          | 70.0                                                 | 92.22                                                |
| CR          | NA          | CW          | 69.95                                                | 136.73                                               |
| CT          | CT          | CT          | 58.31                                                | 171.72                                               |
| CT          | CT          | HC          | 37.47                                                | 45.41                                                |
| CT          | CT          | NA          | 58.31                                                | 71.63                                                |
| CT          | NA          | CW          | 69.95                                                | 89.09                                                |
| CT          | NA          | CR          | 69.95                                                | 124.34                                               |
| CW          | CW          | HA          | 34.98                                                | 70.56                                                |
| CW          | CW          | NA          | 69.95                                                | 149.34                                               |
| HA          | CA          | NA          | 35.0                                                 | 49.55                                                |
| HA          | CR          | NA          | 34.98                                                | 52.05                                                |
| HA          | CW          | NA          | 34.98                                                | 28.88                                                |
| HC          | CT          | NA          | 37.47                                                | 40.07                                                |
| HC          | CT          | HC          | 33.0                                                 | 28.78                                                |
| NA          | CR          | NA          | 69.95                                                | 81.48                                                |

Table S14: C<sub>4</sub>mim<sup>+</sup> angle parameters.  $k_1$  taken from Ref. 11,  $k_2$  from FFGenOpt

| Atom type 1 | Atom type 2 | Atom type 3 | Atom type 4 | $n$ | $k_1$<br>[kcal mol <sup>-1</sup> ] | $k_2$<br>[kcal mol <sup>-1</sup> ] |
|-------------|-------------|-------------|-------------|-----|------------------------------------|------------------------------------|
| CA          | NA          | CT          | CT          | 2   | 15.72                              | 12.72                              |
| CA          | NA          | CT          | CT          | 4   | 26.27                              | 26.27                              |
| CA          | NA          | CT          | HC          | 2   | 17.43                              | 17.43                              |
| CR          | NA          | CT          | CT          | 1   | 20.94                              | 20.94                              |
| CR          | NA          | CT          | HC          | 3   | 0.45                               | 0.45                               |
| CT          | CT          | CT          | CT          | 1   | 37.76                              | 37.76                              |
| CT          | CT          | CT          | CT          | 2   | 19.56                              | 19.56                              |
| CT          | CT          | CT          | CT          | 3   | 10.34                              | 10.34                              |
| CT          | CT          | CT          | HC          | 3   | 0.14                               | 0.14                               |
| CW          | NA          | CT          | HC          | 3   | 1.78                               | 1.78                               |
| CW          | NA          | CT          | CT          | 1   | 28.08                              | 28.08                              |
| CW          | NA          | CT          | CT          | 2   | 3.49                               | 3.49                               |
| CW          | NA          | CT          | CT          | 3   | 10.47                              | 10.47                              |
| HC          | CT          | CT          | HC          | 3   | 0.02                               | 0.02                               |
| NA          | CT          | CT          | CT          | 1   | 23.78                              | 23.78                              |
| NA          | CT          | CT          | CT          | 2   | 8.29                               | 8.29                               |
| NA          | CT          | CT          | CT          | 3   | 10.25                              | 10.25                              |
| NA          | CT          | CT          | HC          | 1   | 18.99                              | 18.99                              |
| X           | CA          | CA          | X           | 2   | 28.84                              | 28.84                              |
| X           | CW          | CW          | X           | 2   | 2.13                               | 2.13                               |
| X           | NA          | CA          | X           | 2   | 14.44                              | 14.44                              |
| X           | NA          | CR          | X           | 2   | 3.23                               | 3.23                               |
| X           | NA          | CW          | X           | 2   | 3.29                               | 3.29                               |

Table S15: C<sub>4</sub>mim<sup>+</sup> dihedral parameters, X denotes a wildcard.  $k_1$  taken from Ref. 11,  $k_2$  from FFGenOpt

### 2.3.3 Tetrafluoroborate

|                | B - F<br>[kcal mol <sup>-1</sup> Å <sup>-2</sup> ] | F - B - F<br>[kcal mol <sup>-1</sup> rad <sup>-2</sup> ] |
|----------------|----------------------------------------------------|----------------------------------------------------------|
| k <sub>1</sub> | 386.33                                             | 80.00                                                    |
| k <sub>2</sub> | 100.0                                              | 141.67                                                   |

Table S16: BF<sub>4</sub><sup>-</sup> force field parameters. k<sub>1</sub> taken from Ref. 11, k<sub>2</sub> from FFGenOpt

### 2.3.4 Trifluoromethanesulfonate

| Atom type 1 | Atom type 2 | k <sub>1</sub><br>[kcal mol <sup>-1</sup> Å <sup>-2</sup> ] | k <sub>2</sub><br>[kcal mol <sup>-1</sup> Å <sup>-2</sup> ] |
|-------------|-------------|-------------------------------------------------------------|-------------------------------------------------------------|
| C3          | F           | 363.8                                                       | 397.35                                                      |
| C3          | S6          | 254.0                                                       | 296.58                                                      |
| O           | S6          | 541.1                                                       | 406.24                                                      |

Table S17: OTf<sup>-</sup> bond parameters. k<sub>1</sub> taken from Ref. 9, k<sub>2</sub> from FFGenOpt

| Atom type 1 | Atom type 2 | Atom type 3 | k <sub>1</sub><br>[kcal mol <sup>-1</sup> rad <sup>-2</sup> ] | k <sub>2</sub><br>[kcal mol <sup>-1</sup> rad <sup>-2</sup> ] |
|-------------|-------------|-------------|---------------------------------------------------------------|---------------------------------------------------------------|
| C3          | S6          | O           | 41.66                                                         | 20.0                                                          |
| F           | C3          | F           | 71.26                                                         | 26.81                                                         |
| F           | C3          | S6          | 81.22                                                         | 158.37                                                        |
| O           | S6          | O           | 46.66                                                         | 75.97                                                         |

Table S18: OTf<sup>-</sup> angle parameters. k<sub>1</sub> taken from Ref. 9, k<sub>2</sub> from FFGenOpt

| Atom type 1 | Atom type 2 | Atom type 3 | Atom type 4 | n | k <sub>1</sub><br>[kcal mol <sup>-1</sup> ] | k <sub>2</sub><br>[kcal mol <sup>-1</sup> ] |
|-------------|-------------|-------------|-------------|---|---------------------------------------------|---------------------------------------------|
| F           | C3          | S6          | O           | 3 | 0.07                                        | 0.07                                        |

Table S19: OTf<sup>-</sup> dihedral parameters. k<sub>1</sub> taken from Ref. 9, k<sub>2</sub> from FFGenOpt

### 2.3.5 Acetate

| Atom type 1 | Atom type 2 | $k_1$<br>[kcal mol <sup>-1</sup> Å <sup>-2</sup> ] | $k_2$<br>[kcal mol <sup>-1</sup> Å <sup>-2</sup> ] |
|-------------|-------------|----------------------------------------------------|----------------------------------------------------|
| OD2C2A      | CD2O2A      | 527.00                                             | 50.0                                               |
| CD2O2A      | CD33A       | 110.00                                             | 439.47                                             |
| CD33A       | HDA3A       | 322.00                                             | 365.67                                             |

Table S20: OAc<sup>-</sup> bond parameters.  $k_1$  taken from Ref. 10,  $k_2$  from FFGenOpt

| Atom type 1 | Atom type 2 | Atom type 3 | $k_1$<br>[kcal mol <sup>-1</sup> rad <sup>-2</sup> ] | $k_2$<br>[kcal mol <sup>-1</sup> rad <sup>-2</sup> ] |
|-------------|-------------|-------------|------------------------------------------------------|------------------------------------------------------|
| OD2C2A      | CD2O2A      | OD2C2A      | 83.70                                                | 54.65                                                |
| OD2C2A      | CD2O2A      | CD33A       | 23.80                                                | 178.52                                               |
| CD2O2A      | CD33A       | HDA3A       | 27.70                                                | 57.47                                                |
| HDA3A       | CD33A       | HDA3A       | 35.50                                                | 22.0                                                 |

Table S21: OAc<sup>-</sup> angle parameters.  $k_1$  taken from Ref. 10,  $k_2$  from FFGenOpt

| Atom type 1 | Atom type 2 | Atom type 3 | Atom type 4 | $n$ | $k_1$<br>[kcal mol <sup>-1</sup> ] | $k_2$<br>[kcal mol <sup>-1</sup> ] |
|-------------|-------------|-------------|-------------|-----|------------------------------------|------------------------------------|
| OD2C2A      | CD2O2A      | CD33A       | HDA3A       | 6   | 0.21                               | 0.21                               |

Table S22: OAc<sup>-</sup> dihedral parameters.  $k_1$  taken from Ref. 10,  $k_2$  from FFGenOpt

### 2.3.6 Dicyanamide

| Atom type 1 | Atom type 2 | $k_1$<br>[kcal mol <sup>-1</sup> Å <sup>-2</sup> ] | $k_2$<br>[kcal mol <sup>-1</sup> Å <sup>-2</sup> ] |
|-------------|-------------|----------------------------------------------------|----------------------------------------------------|
| CG          | NE          | 509.50                                             | 584.06                                             |
| CG          | N1          | 994.70                                             | 1429.27                                            |

Table S23: N(CN)<sub>2</sub><sup>-</sup> bond parameters.  $k_1$  taken from Ref. 11,  $k_2$  from FFGenOpt

| Atom type 1 | Atom type 2 | Atom type 3 | $k_1$<br>[kcal mol <sup>-1</sup> rad <sup>-2</sup> ] | $k_2$<br>[kcal mol <sup>-1</sup> rad <sup>-2</sup> ] |
|-------------|-------------|-------------|------------------------------------------------------|------------------------------------------------------|
| CG          | NE          | CG          | 66.00                                                | 117.11                                               |
| NE          | CG          | N1          | 65.04                                                | 80.90                                                |

Table S24: N(CN)<sub>2</sub><sup>-</sup> angle parameters.  $k_1$  taken from Ref. 11,  $k_2$  from FFGenOpt

| Atom type 1 | Atom type 2 | Atom type 3 | Atom type 4 | $n$ | $k_1$<br>[kcal mol <sup>-1</sup> ] | $k_2$<br>[kcal mol <sup>-1</sup> ] |
|-------------|-------------|-------------|-------------|-----|------------------------------------|------------------------------------|
| CG          | NE          | CG          | N1          | 2   | 0.00                               | 0.00                               |

Table S25: N(CN)<sub>2</sub><sup>-</sup> dihedral parameters.  $k_1$  taken from Ref. 11,  $k_2$  from FFGenOpt

## 2.4 IR Spectra using scaled force constants

The IR spectra have been evaluated utilizing not only the force constants given in Tables S10 to S25, but also from trajectories with force constants for bond and angle terms subjected to scaling by 0.95, 0.90, 0.80, and 0.60. It should be noted, however, that in this particular methodology, the dihedral terms were not subjected to scaling.

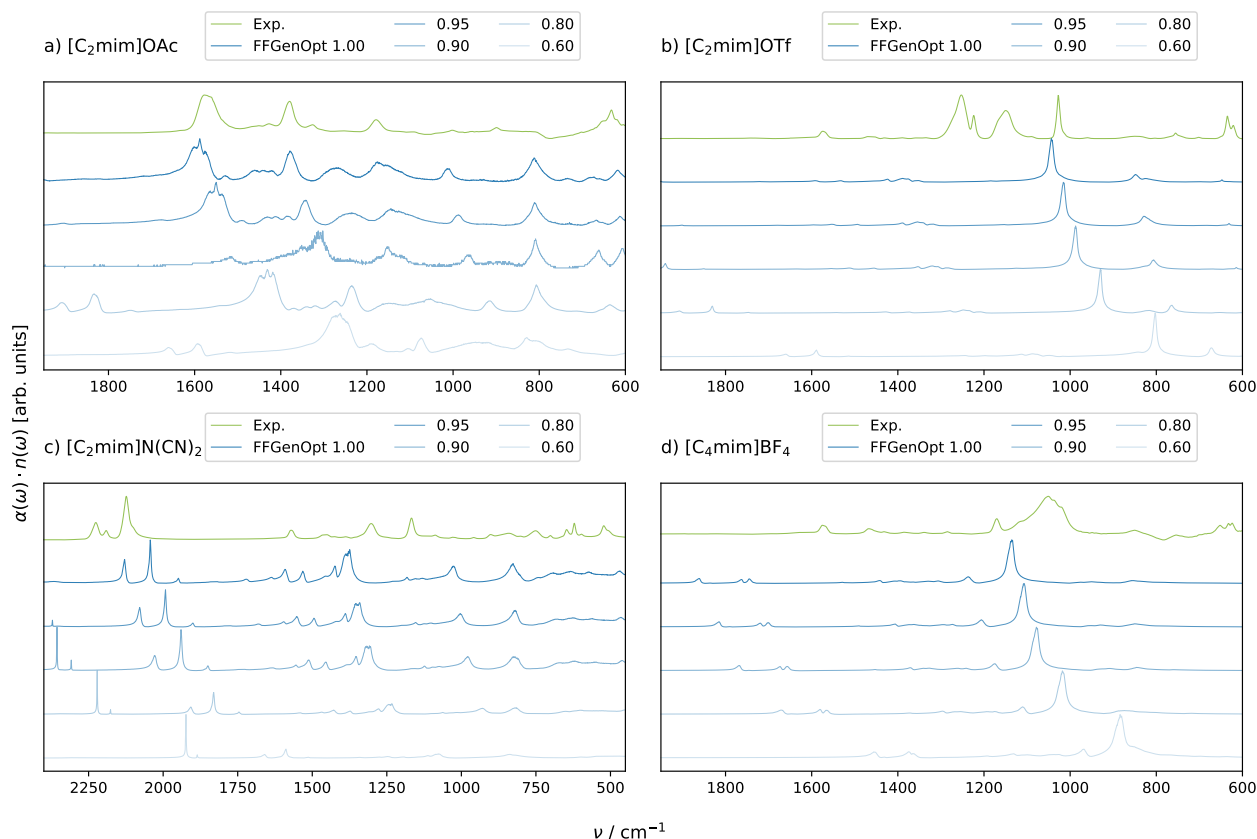

Figure S2: IR spectra calculated from polarizable MD trajectories using scaled force constants for bond and angle terms

The resulting IR spectra, as depicted in Fig. S2, demonstrate a consistent trend of progressive red-shift in correlation with decreasing scaling factors. Upon examination of  $[\text{C}_2\text{mim}]\text{OAc}$  and  $[\text{C}_2\text{mim}]\text{N}(\text{CN})_2$ , it becomes evident that the shapes of the resulting IR spectra undergo significant alterations upon the transition from a scaling factor of 0.80 to 0.60. This essentially establishes a boundary concerning the extent of the scaling magnitude that can be implemented.

### 3 Technical issues of calculating IR spectra

#### 3.1 Numerical time-derivative versus velocities

The time derivative of the molecular dipole moment can be obtained by numerical derivation of the transient coordinates

$$\dot{\vec{\mu}}_i(t) = \sum_{\beta} q_{i\beta} \frac{d\vec{r}_{i\beta}(t)}{dt} \quad (2)$$

or by using the atomic velocities

$$\dot{\vec{\mu}}_i(t) = \sum_{\beta} q_{i\beta} \vec{v}_{i\beta}(t). \quad (3)$$

This also applies to the collective dipole moment  $\dot{\vec{M}}_D(t) = \sum_i \dot{\vec{\mu}}_i(t)$ . However, as visible in Fig. S4 both ways of calculating the derivative yield similar IR spectra. Since writing the velocity trajectories in addition to the coordinate trajectories need extra disk space and computational time, the numerical derivative method is fine.

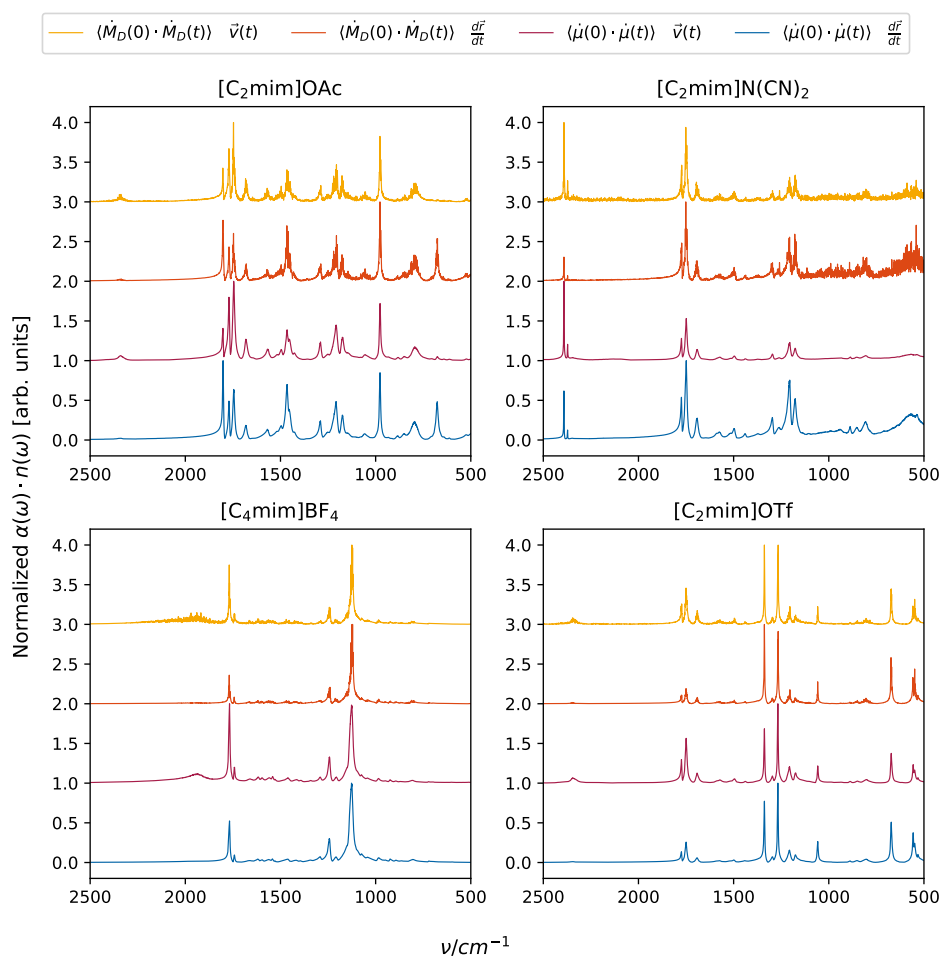

Figure S3: IR spectra calculated from polarizable MD trajectories.

### 3.2 The influence of SHAKE

In classical MD simulations time steps of 1 or 2 fs are used after applying the SHAKE algorithm to keep bond fixed involving hydrogens. However, the time interval between two frames in our polarizable MD simulations has to be reduced to 0.5 fs due to the Drude oscillators. As visible in Fig. S4 there is no visible difference

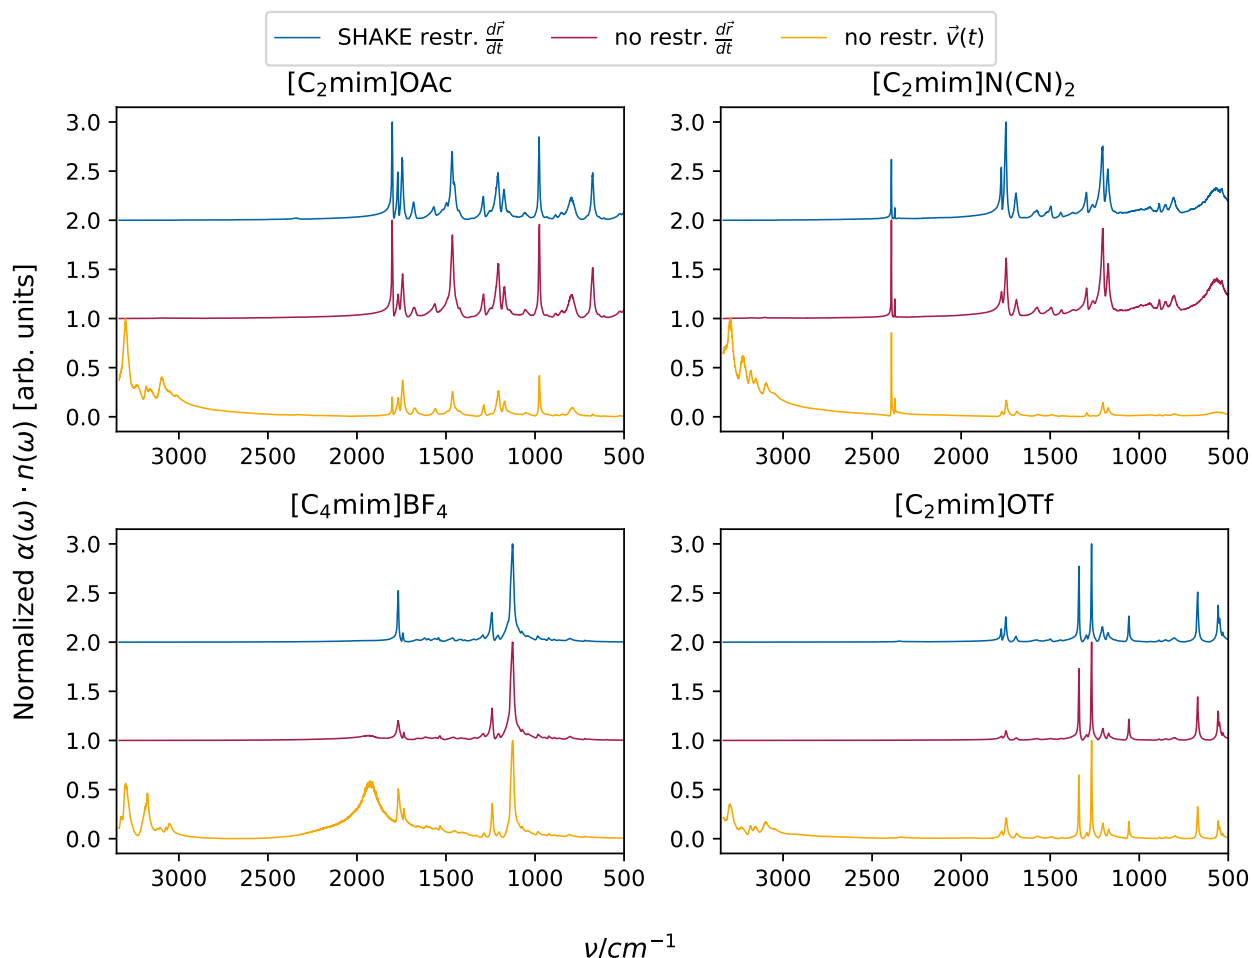

Figure S4: IR spectra calculated using the FFGenOpt force fields with and without hydrogen - heavy atom bonds frozen (SHAKE restraints)

between the IR spectra obtained from the numerical derivative of the molecular dipole moment with (blue) and without (red) SHAKE. Of course, vibrations beyond 3000  $\text{cm}^{-1}$  are not detectable in MD simulations using SHAKE. These vibrations are also not visible in the red curves in the simulations without SHAKE and using the numerical derivative of the molecular dipole moments. This may be due to the fact that not all frames have been saved to disk but every tenth frame. This is common procedure for coordinate trajectories. If one is interested in the vibrations beyond 3000  $\text{cm}^{-1}$ , one should use the velocities written at each time step (yellow curve) to compute the corresponding IR spectra.

### 3.3 Machine learning potentials

Unfortunately, the agreement between IR spectra from numerical derivation and velocities is no longer given in case of machine learning potentials as visible in Fig. S5. Here, the computing of the IR spectra from the

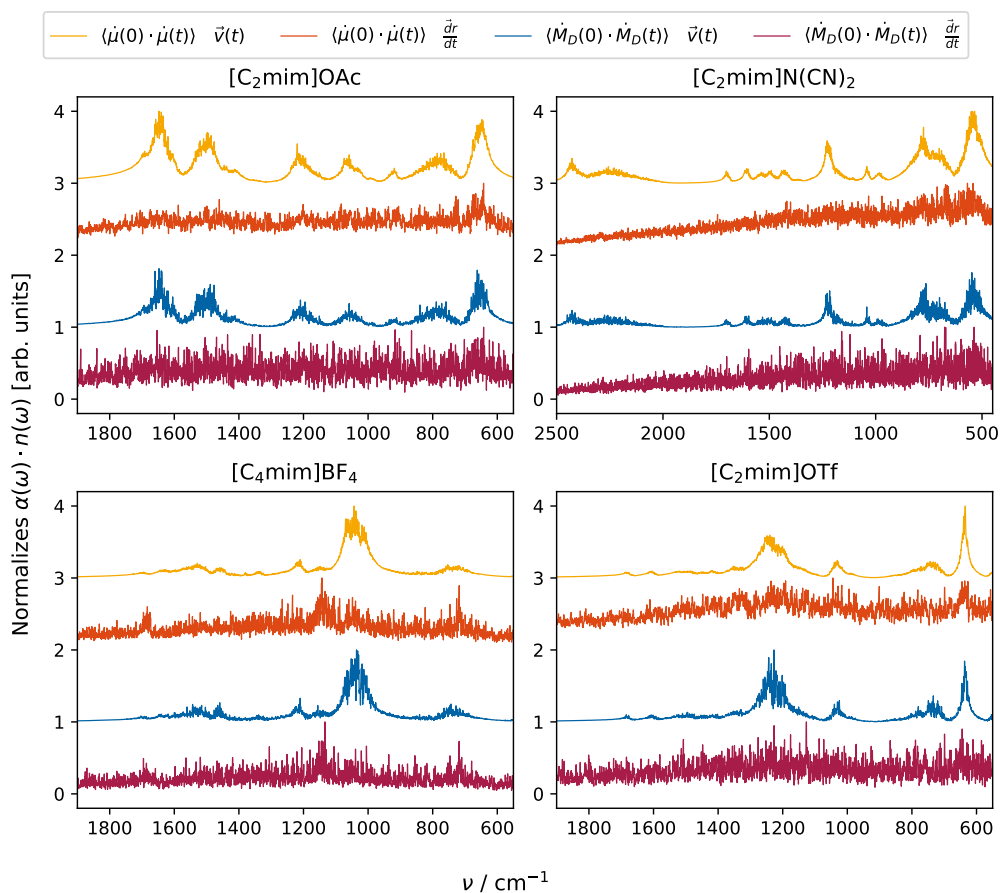

Figure S5: IR spectra calculated using machine learning potentials

numerical derivative of the molecular dipole moments fails (orange curve for  $\dot{\mu}$  and red curve for  $\dot{M}_D$ ). One must use the velocities which may be due to the fact that the machine learning potentials have no functional form.



### 3.4 Mixed MD/ML approaches

In principle, two methods exist for the mixing of MD and ML approaches:

First, using one approach for the cations and the other for the anions. We applied this in the case of  $[\text{C}_4\text{mim}]\text{BF}_4$  (see Fig. S6) as boron is not available in ANI-2x.<sup>12</sup> Consequently, the cation was propagated by an ML potential and the forces for  $\text{BF}_4^-$  as well as the interactions between cations and anions were computed by a polarizable force field. Interestingly, the peak at  $1040\text{ cm}^{-1}$  (yellow and green curve in Fig. S6) concerns the anion. Despite being modelled by a polarizable force field in the ML + FF trajectories, the agreement is significantly better than that obtained from the pure polarizable trajectories (blue curve). This emphasizes again the importance of the local environment of the molecules for computing IR spectra.

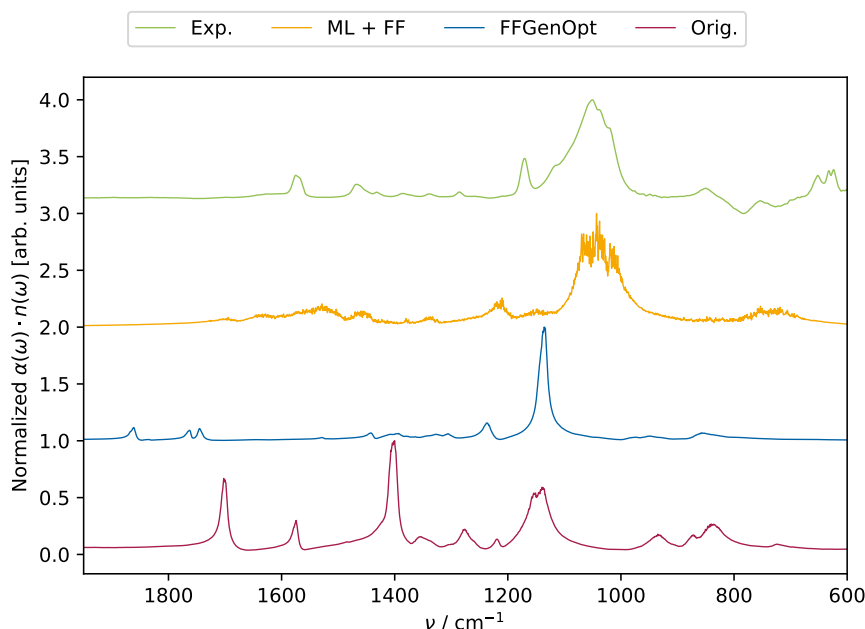

Figure S6: Comparison of IR spectra calculated by polarizable MD (red and blue lines) and a mixed setup using the ML potential for the cation and the MD potential for the anion (yellow)

The second approach to mix MD and ML is a dual topology approach. Here, the molecule is described by two potentials at the very same time, one from ML and one from polarizable MD. The parameter  $\lambda$  denotes the weighting between these two potentials. In our case, we used  $\lambda=0.5$  for  $[\text{C}_2\text{mim}]\text{N}(\text{CN})_2$  and yielded reasonable agreement with the experimental spectrum (see Fig. 5c in the main article).

However, all mixed approaches suffer from the disadvantages of the ML approaches: The additional computational time and the restriction to the velocities.

## References

- [1] J. P. Merrick, D. Moran and L. Radom, *J. Phys. Chem. A*, 2007, **111**, 11683–11700.
- [2] <https://cccbdb.nist.gov/vsfx.asp>.
- [3] A. C. Vaiana, Z. Cournia, I. B. Costescu and J. C. Smith, *Comput. Phys. Commun.*, 2005, **167**, 34–42.
- [4] H. W. Kuhn, *Naval research logistics quartely*, 1955, **2**, 83–97.
- [5] I. Rechenberg, *Simulationsmehtoden in der Medizin und Biologie*, Springer, Heidelberg, 1975.
- [6] J. H. Holland, *Adaption in Natural and Artificial Systems*, University of Michigan Press, Ann Arbor, MI, second edition edn, 1992.
- [7] M. Affenzeller, S. Winkler, S. Wagner and A. Beham, *Genetic Algorithms and Genetic Programming: Modern Concepts and Practical Applications*, Chapman and Hall, 2009.
- [8] E. Wirsansky, *Hands-On Genetic Algorithms with Python: Applying genetic algorithms to solve real-world deep learning and artificial intelligence problems*, Packt Publishing, 2020.
- [9] A. Szabadi, P. Honegger, F. Schöfbeck, M. Sappl, E. Heid, O. Steinhauser and C. Schröder, *Phys. Chem. Chem. Phys.*, 2022, **24**, 15776–15790.
- [10] P. Chatterjee, E. Heid, C. Schröder and A. D. MacKerell, *Biophys. J.*, 2019, **116**, 142a.
- [11] A. Szabadi, R. Elfgén, R. Macchieraldo, F. L. Kearns, H. Lee Woodcock, B. Kirchner and C. Schröder, *J. Mol. Liq.*, 2021, **337**, 116521.
- [12] C. Devereux, J. S. Smith, K. K. Huddleston, K. Barros, R. Zubatyuk, O. Isayev and A. E. Roitberg, *J. Chem. Theory Comput.*, 2020, **16**, 4192–4202.
